# Supplementary material
Source: ML conference proceedings conference paper supplement (https://openreview.net/forum?id=mL0KvSwXzk)
Supplement: supplementary_material [file attachment]

## APPENDIX

### A VISUAL PRESENTATION OF PREDICTION RESULTS

The visualization results for the other datasets are shown below: Figure1 demonstrates PastNet’s proficiency in the KTH pedestrian motion dataset, accurately predicting future pedestrian trajectories; Finally, Figure2 illustrates PastNet’s capability in predicting the systematic evolution of physical dynamics datasets such as RDS, EDPS, and FS.

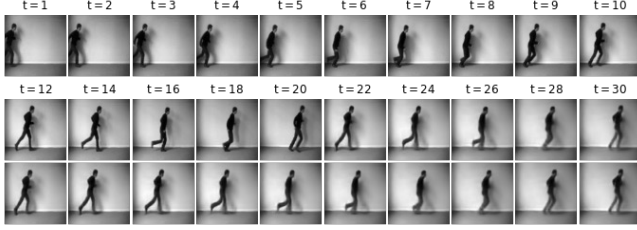

**Figure 1: Example of prediction results on the KTH dataset. Top: input Pedestrian movement sequence; Middle: future real Pedestrian movement sequence; Bottom: PastNet predicted Pedestrian movement sequence.**

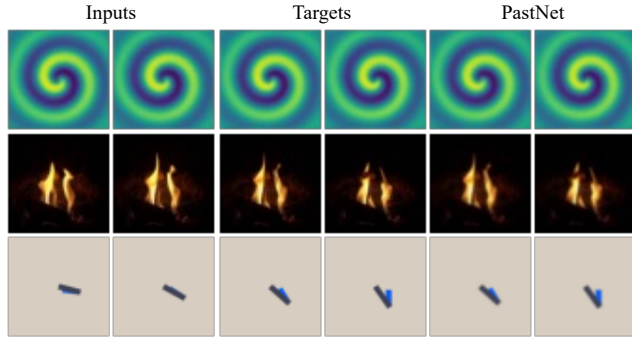

**Figure 2: Examples of prediction results on the Reaction Diffusion System, Elastic Double Pendulum System and Fire System datasets; two input frames predict two output frames; from left to right, the input sequence, the target sequence and the PastNet prediction sequence.**

### B DESCRIPTION OF THE DETAILS OF THE PDE EQUATIONS

#### B.1 2D Navier-Stokes Equations

This paper considers the 2D Navier-Stokes equations for a viscous, incompressible fluid with vorticity in the form of a curl on the unit torus.

$$\begin{aligned} \partial_t w(x, t) + u(x, t) \cdot \nabla w(x, t) &= \nu \Delta w(x, t) + f(x) & x \in (0, 1)^2, t \in (0, T] \\ \nabla \cdot u(x, t) &= 0, & x \in (0, 1)^2, t \in [0, T] \\ w(x, 0) &= w_0(x), & x \in (0, 1)^2 \end{aligned} \quad (1)$$

In this context,  $u \in C([0, T]; H_r^{per}((0, 1)^2; \mathbb{R}^2))$  for any  $r > 0$  is the velocity field,  $w = \nabla \times u$  is the vorticity,  $w_0 \in L_{per}^2((0, 1)^2; \mathbb{R})$  is the initial vorticity,  $\nu \in \mathbb{R}^+$  is the viscosity coefficient, and  $f \in L_{per}^2((0, 1)^2; \mathbb{R})$  is the forcing function. The time evolution of the equation is visualized in Figure 3.

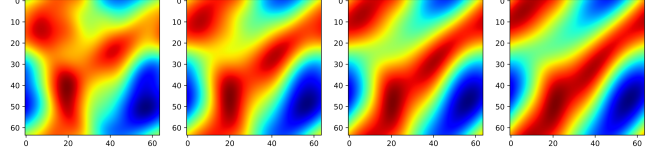

**Figure 3: This visualization concerns the time evolution of data generated by the 2D Navier-Stokes equations.**

#### B.2 2D Shallow-Water Equations

The Navier-Stokes equations are the fundamental equations that describe viscous flow in fluid mechanics. The shallow water equations can be derived from the Navier-Stokes equations and are used to model free-surface flow problems. In two dimensions, these equations can be expressed as a system of hyperbolic partial differential equations.

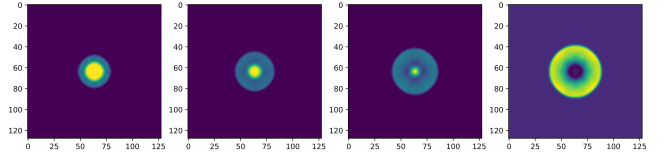

**Figure 4: This visualization concerns the time evolution of data generated by the 2D shallow water equations.**

$$\partial_t h + \partial_x hu + \partial_y hv = 0 \quad (2)$$

$$\partial_t hu + \partial_x \left( u^2 h + \frac{1}{2} g_r h^2 \right) = -g_r h \partial_x b \quad (3)$$

$$\partial_t hv + \partial_y \left( v^2 h + \frac{1}{2} g_r h^2 \right) = -g_r h \partial_y b \quad (4)$$

In the shallow water equations, which are used to model free-surface flow problems,  $u$  and  $v$  represent the horizontal and vertical velocities,  $h$  represents the water depth, and  $b$  describes the spatial variation of the depth. The terms  $hu$  and  $hv$  can be interpreted as the directional momentum components, and  $g$  represents the acceleration due to gravity.

The benchmark for the shallow water equation problem presented in Subsection ?? includes a specific simulation of a two-dimensional radial dam-breaking scheme. The simulation takes place on a square domain  $\Omega = [-2.5, 2.5]^2$ , where the initial water height is represented by a circular bulge at the center of the domain.

$$h(t = 0, x, y) = \begin{cases} 2.0, & \text{for } r < \sqrt{x^2 + y^2} \\ 1.0, & \text{for } r \geq \sqrt{x^2 + y^2} \end{cases} \quad (5)$$

The time evolution of the equation is visualized in Figure 4.
